# Supplementary material for: Large-Scale and Simple Synthesis of NiFe(OH)x Electrode Derived from Raney Ni Precursor for Efficient Alkaline Water Electrolyzer
Source: MDPI journal article supplement (doi:10.3390/catal14050296), 2024-04-29
Supplement: s1 [file s1]

## Supplementary Materials

### Large-scale and Simple Synthesis of $\text{NiFe}(\text{OH})_x$ Electrode Derived from Raney Ni Precursor for Efficient Alkaline Water Electrolyzer

Tianshui Li,<sup>1</sup> Wei Liu,<sup>1</sup> Huijun Xin,<sup>1</sup> Qihao Sha,<sup>1</sup> Haijun Xu<sup>1,\*</sup> and Yun Kuang<sup>1,2,\*</sup>

<sup>1</sup> State Key Laboratory of Chemical Resource Engineering, College of Chemistry, University of Chemical Technology, Beijing 100029, P. R. China

<sup>2</sup> Ocean Hydrogen Energy R&D Center, Research Institute of Tsinghua University in Shenzhen, Shenzhen, P. R. China

\* Corresponding author E-mail: [hjxu@mail.buct.edu.cn](mailto:hjxu@mail.buct.edu.cn), [kuangy@tsinghua-sz.org](mailto:kuangy@tsinghua-sz.org)

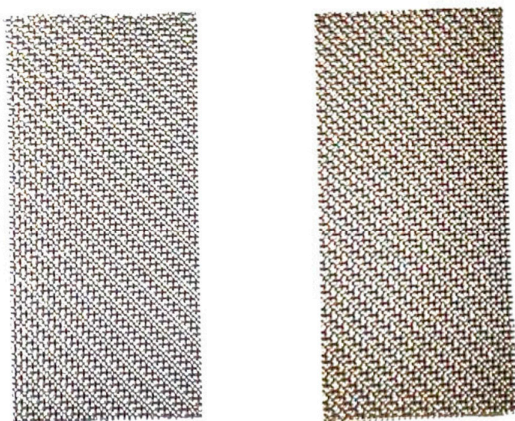

**Figure S1.** Images of bare Ni mesh before and after immersing in a solution containing  $\text{Ni}^{2+}$  and  $\text{Fe}^{3+}$  at  $60^\circ\text{C}$  for 12 hours, the left image depicts the original bare Ni mesh, while the right image illustrates the Ni mesh after immersion.

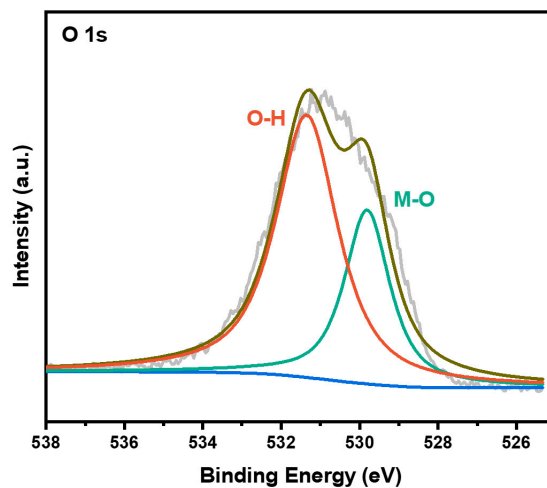

**Figure S2.** The high-resolution XPS spectrum of O 1s for NiFe(OH)<sub>x</sub>@Raney Ni

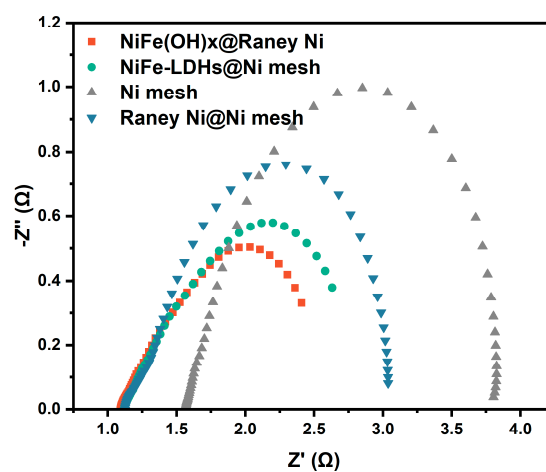

**Figure S3.** EIS test curves for different electrodes.

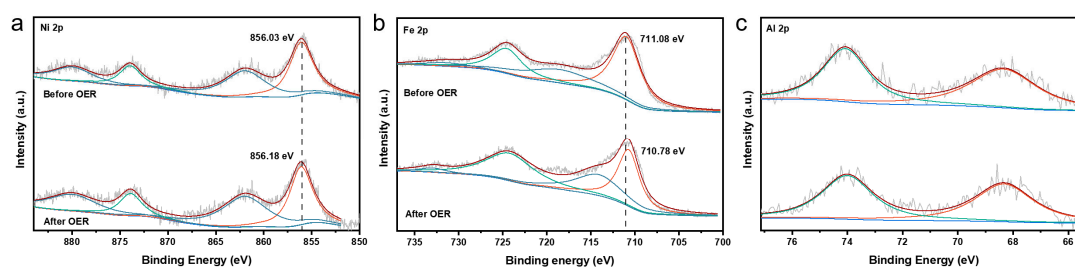

**Figure S4.** A comparison of the high-resolution XPS spectra for (a) Ni 2p, (b) Fe 2p, and (c) Al 2p before and after the OER stability test.

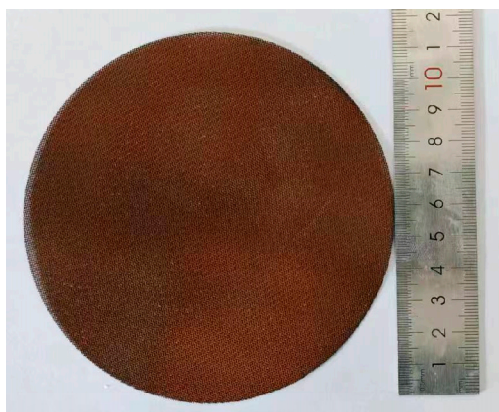

**Figure S5.** Appearance of the anode surface assembled into the electrolyzer.

**Table S1** The ratio of various elements characterized by EDS

| Element | Normalized mass (%) | Atom (%) |
|---------|---------------------|----------|
| Ni      | 63.28               | 55.59    |
| Fe      | 25.95               | 23.83    |
| Al      | 10.77               | 20.59    |
| Total   | 100                 | 100      |

**Table S2** Faraday efficiency testing of H<sub>2</sub> and O<sub>2</sub> in the electrolyzer.

| Time    | Current<br>density (mA<br>cm <sup>-2</sup> ) | Theoretical<br>production of H <sub>2</sub><br>(mL) | Actual<br>production of H <sub>2</sub><br>(mL) | H <sub>2</sub><br>Faraday<br>efficiency | Theoretical<br>production<br>of O <sub>2</sub> (mL) | Actual<br>production<br>of O <sub>2</sub> (mL) | O <sub>2</sub><br>Faraday<br>efficiency |
|---------|----------------------------------------------|-----------------------------------------------------|------------------------------------------------|-----------------------------------------|-----------------------------------------------------|------------------------------------------------|-----------------------------------------|
| 50      | 50                                           | 65.75                                               | 65.3                                           | 99.3                                    | 33.88                                               | 33.5                                           | 98.9                                    |
| 50      | 100                                          | 131.50                                              | 130.2                                          | 99.0                                    | 65.75                                               | 65.5                                           | 99.6                                    |
| 50      | 150                                          | 197.25                                              | 196.3                                          | 99.5                                    | 98.63                                               | 98.2                                           | 99.6                                    |
| Average |                                              |                                                     |                                                | 99.3                                    |                                                     |                                                | 99.4                                    |
